# Supplementary material for: A paper-based potentiometric sensing platform based on molecularly imprinted nanobeads for determination of bisphenol A
Source: Royal Society of Chemistry journal article supplement (doi:10.1039/c8ay01229f), 2018-01-01
Supplement: c8ay01229f1.pdf [file c8ay01229f1.pdf]

## Supporting Information for

### A paper-based potentiometric sensing platform based on molecularly imprinted nanobeads for determination of bisphenol A

Ayman H. Kamel<sup>a,b,c</sup>, Xiaojing Jiang<sup>a,c</sup>, Pengjuan Li<sup>a,c</sup>, Rongning Liang<sup>\*,a</sup>

<sup>a</sup> Key Laboratory of Coastal Environmental Processes and Ecological Remediation, Yantai Institute of Coastal Zone Research (YIC), Chinese Academy of Sciences (CAS); Shandong Provincial Key Laboratory of Coastal Zone Environmental Processes, YICCAS, Yantai, Shandong 264003, P. R. China.

<sup>b</sup> Department of Chemistry, Faculty of Science, Ain Shams University, 11655, Cairo, Egypt.

<sup>c</sup> Contributed equally to this work.

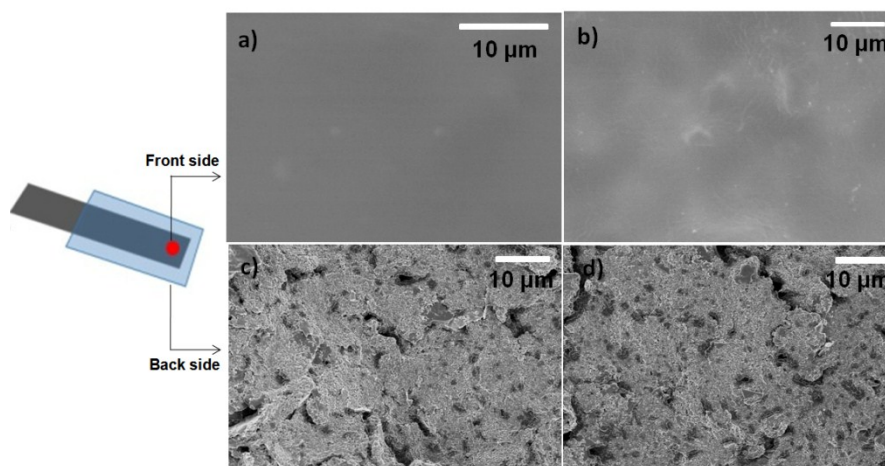

**Fig. S1** The microstructural changes of the proposed sensing platform before (a, c) and after detection (b, d). (a) and (b): front side; (c) and (d): back side. Here, the front and back sides refer to the sensing membrane side and the paper substrate side, respectively.

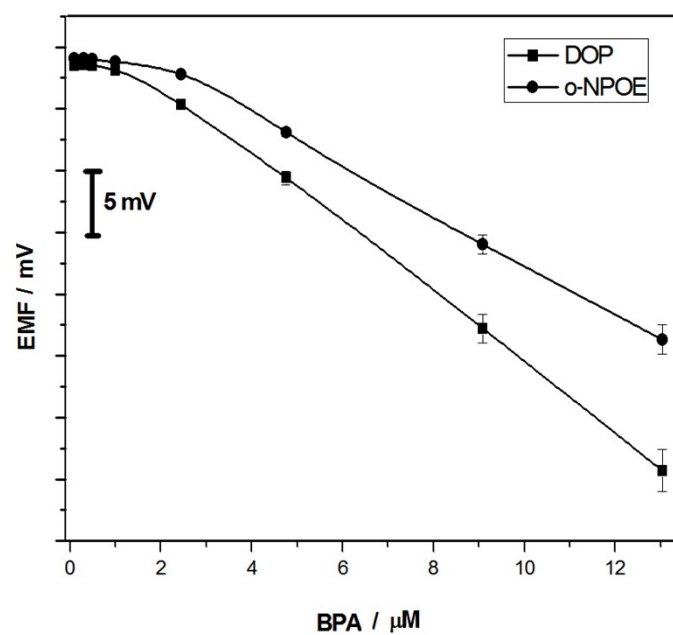

**Fig. S2** Effect of the plasticizers on the potentiometric response of paper-based sensor to neutral BPA in 33 mM PBS at pH 7.5.

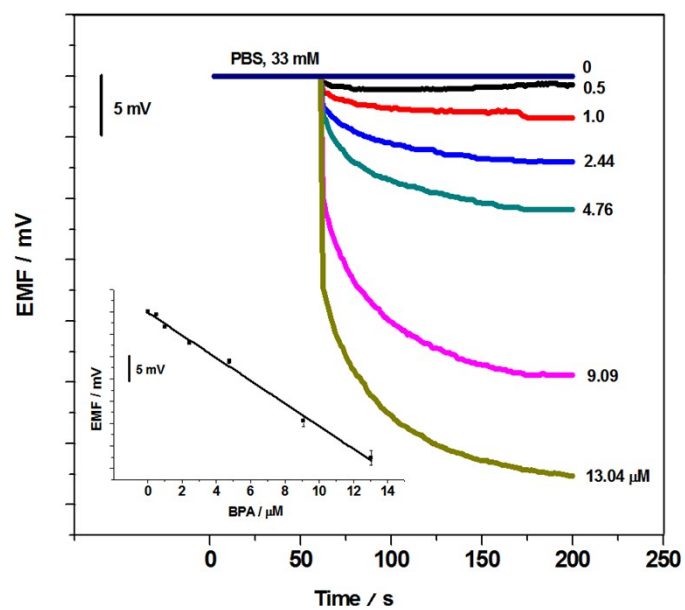

**Fig. S3** Typical dynamic potential responses to neutral BPA using the traditional glassy carbon-based potentiometric sensor.

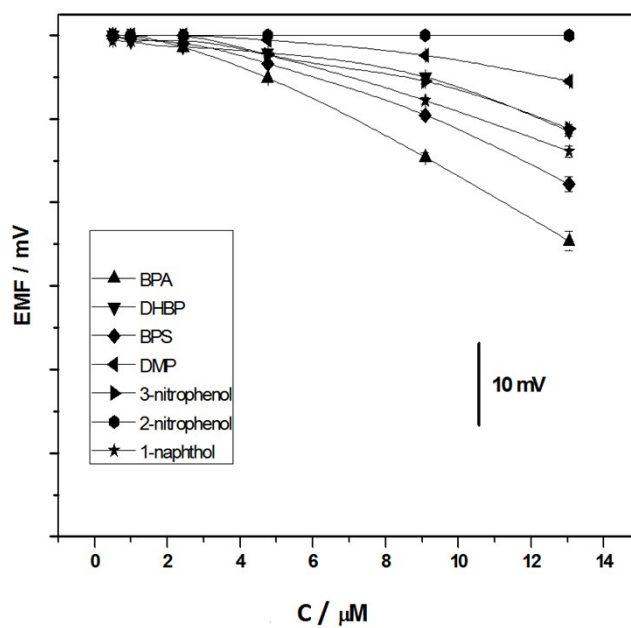

**Fig. S4** Potentiometric selectivity of NIP membrane-based sensors towards bisphenol S (BPS), tetrabromo bisphenol A (TBBP), 1-naphthol; 2-nitrophenol, 3-nitrophenol, 4,4'-dihydroxybiphenyl (DHBP) and 2,6 dimethylphenol (DMP).
